# Supplementary material
Source: Springer Nature journal article supplement (https://www.springermedizin.de/resource/supplementary/12955_2004_153_MOESM1_ESM.pdf/9559818)
Supplement: MOESM1 [file 9559818]

Possible relationships

| Effects of chronic medical condition A on HRQoL | Effects of chronic medical condition B on HRQoL | Additive                                                                                                              | Subtractive*                                                                   | Synergistic*                                                                   |
|-------------------------------------------------|-------------------------------------------------|-----------------------------------------------------------------------------------------------------------------------|--------------------------------------------------------------------------------|--------------------------------------------------------------------------------|
| Lowers HRQoL                                    | Lowers HRQoL                                    | Lowering of HRQoL approximates the sum of the independent effects of conditions A and B.                              | Lowering of HRQoL is <u>less</u> than expected in an additive relationship.    | Lowering of HRQoL is <u>more</u> than expected in an additive relationship.    |
|                                                 |                                                 |                                                                                                                       |                                                                                |                                                                                |
| Improves HRQoL                                  | Improves HRQoL                                  | Improvement in HRQoL approximates the sum of the independent effects of conditions A and B.                           | Improvement in HRQoL is <u>less</u> than expected in an additive relationship. | Improvement in HRQoL is <u>more</u> than expected in an additive relationship. |
|                                                 |                                                 |                                                                                                                       |                                                                                |                                                                                |
| Lowers HRQoL                                    | Improves HRQoL                                  | Net effect <sup>†</sup> : Lowering of HRQoL approximates the sum of the independent effects of conditions A and B.    | Lowering of HRQoL is <u>less</u> than expected in an additive relationship.    | Lowering of HRQoL is <u>more</u> than expected in an additive relationship.    |
|                                                 |                                                 |                                                                                                                       |                                                                                |                                                                                |
| Lowers HRQoL                                    | Improves HRQoL                                  | Net effect <sup>†</sup> : Improvement in HRQoL approximates the sum of the independent effects of conditions A and B. | Improvement in HRQoL is <u>less</u> than expected in an additive relationship. | Improvement in HRQoL is <u>more</u> than expected in an additive relationship. |
|                                                 |                                                 |                                                                                                                       |                                                                                |                                                                                |
